# Supplementary material for: Concordance and agreement between different activity scores in polymyalgia rheumatica
Source: PubMed Central journal article supplement — RMD Open. 2024 Mar 15;10(1):e003741. doi: 10.1136/rmdopen-2023-003741 (PMC10946364; doi:10.1136/rmdopen-2023-003741), 2024-03-15
Supplement: rmdopen-2023-003741supp001.pdf [file rmdopen-2023-003741supp001.pdf]

## Supplementary

Figure 1: Scatter plots between CRP-PMR-AS and ESR-PMR-AS (A), clin-PMR-AS (B) and imp-CRP PMR-AS (C) at inclusion and between CRP-PMR-AS and ESR-PMR-AS (D), clin-PMR-AS (E) and imp-CRP PMR-AS (F) at week 24 for the placebo group (n=51). Trendlines are represented by a continuous line.

**A**

Scatter plot PMR-AS and ESR PMR-AS at Inclusion  
ARM=Placebo

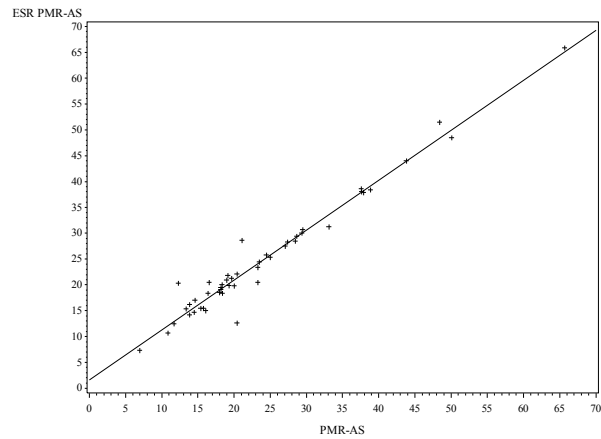**B**

Scatter plot PMR-AS and clin PMR-AS at Inclusion  
ARM=Placebo

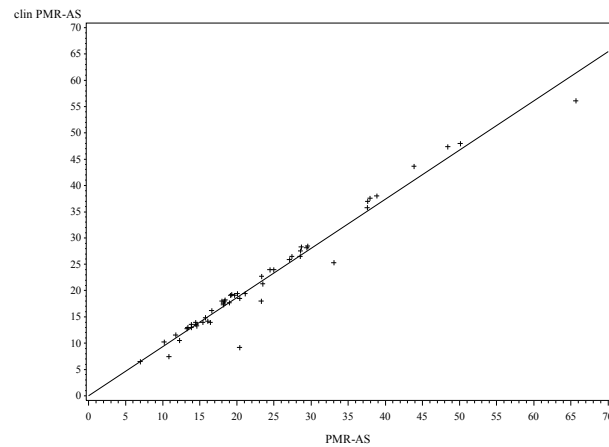**C**

Scatter plot PMR-AS and CRP Imputed PMR-AS at Inclusion  
ARM=Placebo

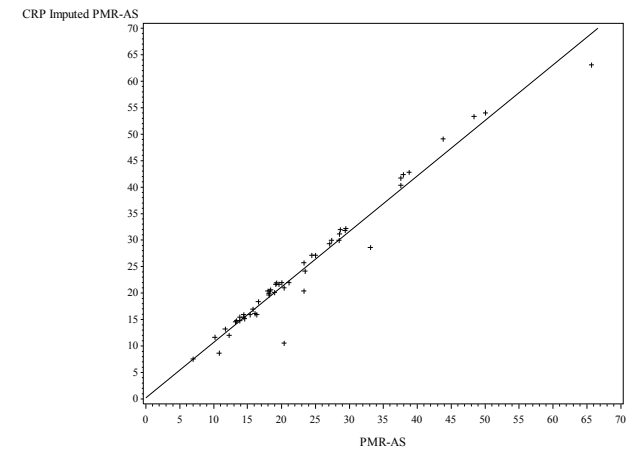**D****E****F**

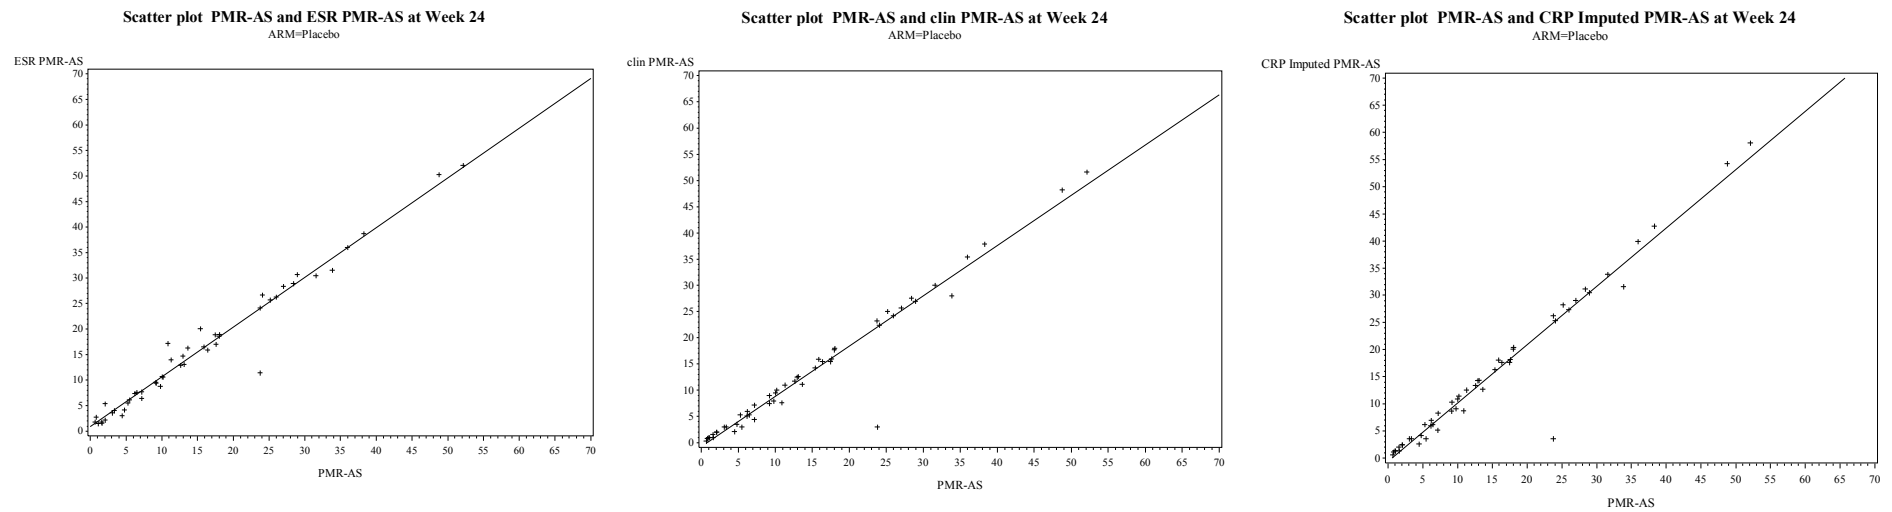

PMR: polymyalgia rheumatica; AS: activity score; ESR: erythrocyte sedimentation rate; CRP: C reactive protein; clin: clinical; imp-  
CRP: imputed CRP

Figure 2: Scatter plots between CRP-PMR-AS and ESR-PMR-AS (A), clin-PMR-AS (B) and imp-CRP PMR-AS (C) at inclusion and between CRP-PMR-AS and ESR-PMR-AS (D), clin-PMR-AS (E) and imp-CRP PMR-AS (F) at week 24 for the tocilizumab group (n= 49). Trendlines are represented by a continuous line.

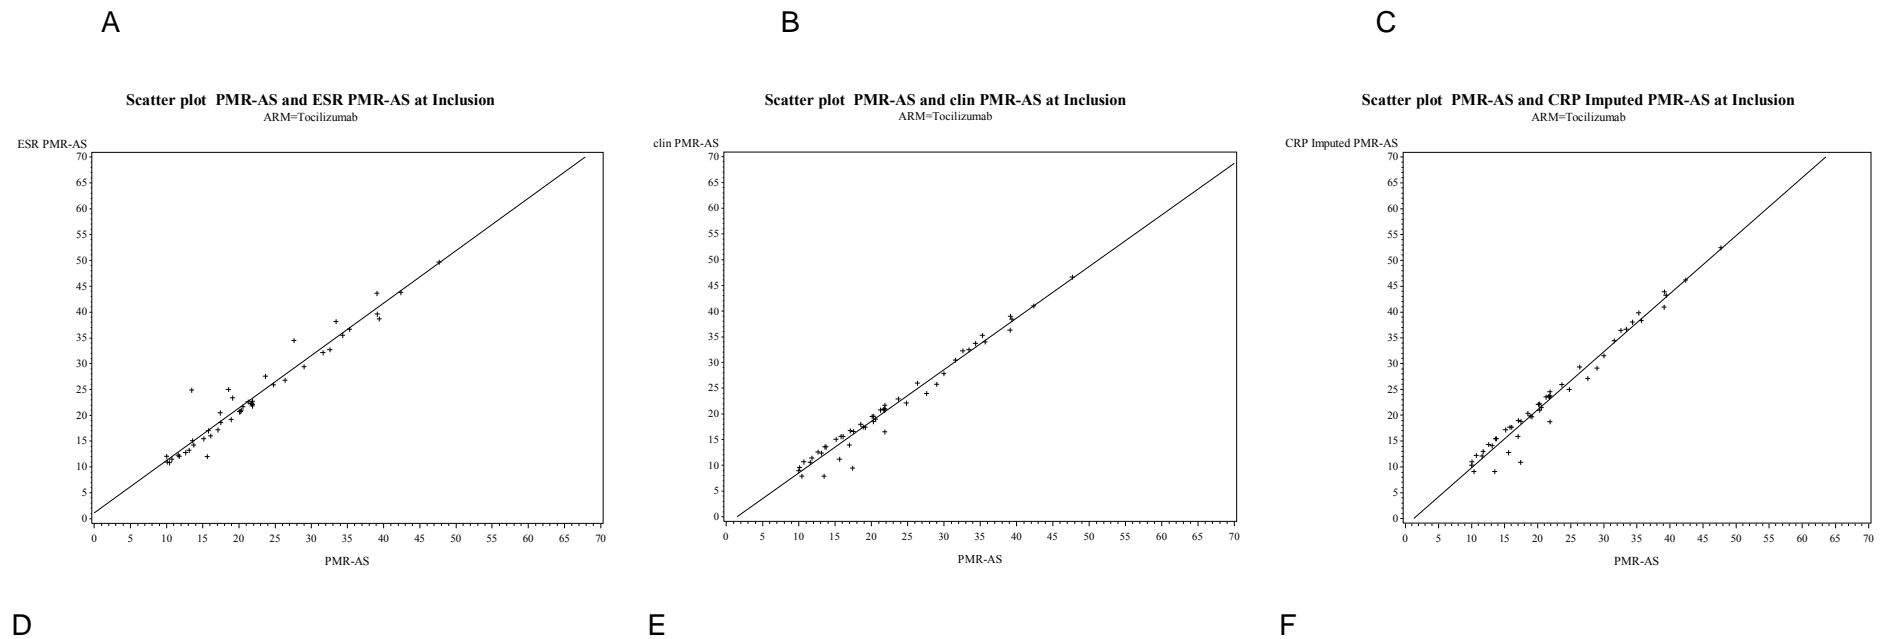

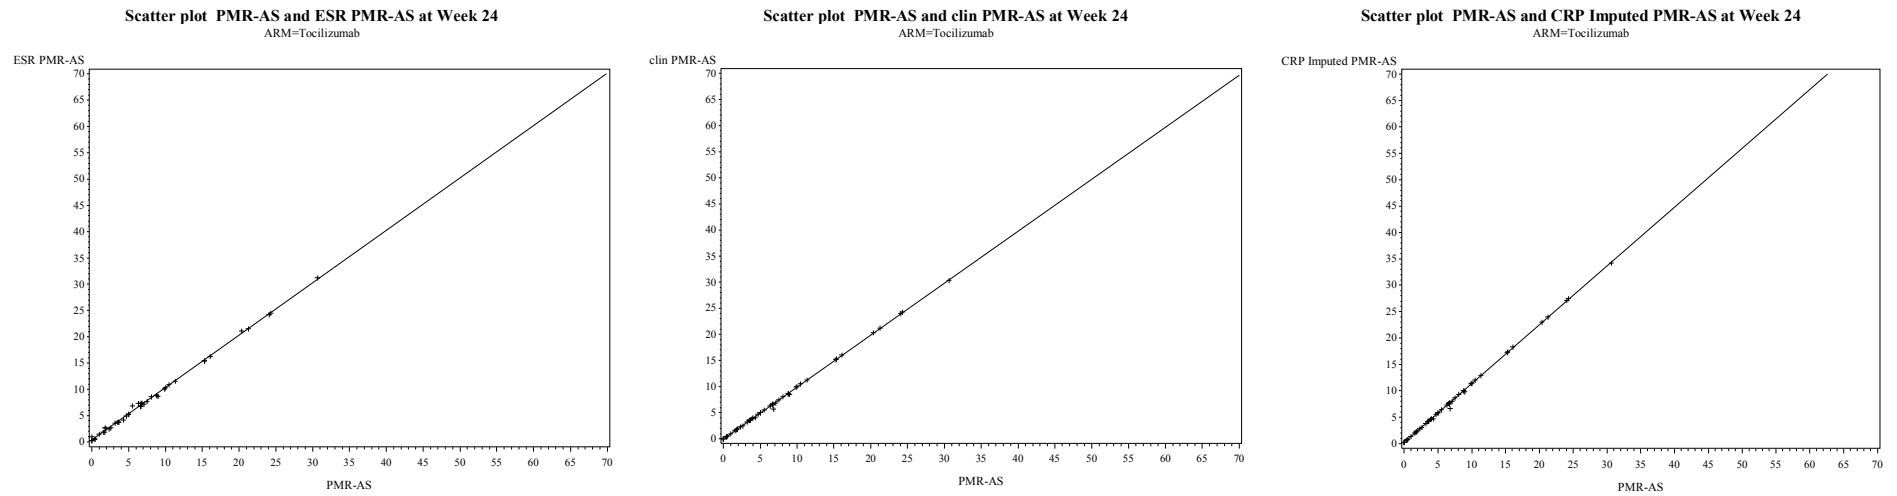

PMR: polymyalgia rheumatica; AS: activity score; ESR: erythrocyte sedimentation rate; CRP: C reactive protein; clin: clinical; imp-  
CRP: imputed CRP

Figure 3: Bland–Altman plots using CRP-PMR-AS as the gold standard at inclusion in the placebo group (n=51). The y-axis represents the difference between CRP-PMR-AS and ESR-PMR-AS (A), difference between CRP-PMR-AS and clin-PMR-AS (B) and difference between CRP-PMR-AS and imp-CRP PMR-AS (C), and at week 24, in the placebo group, the y-axis shows the difference between CRP-PMR-AS and ESR-PMR-AS (D), difference between CRP-PMR-AS and clin-PMR-AS (E) and difference between CRP-PMR-AS and imp-CRP PMR-AS (F).

A

Bland Altman Plot of CRP PMR-AS and ESR PMR-AS at Inclusion on Placebo group

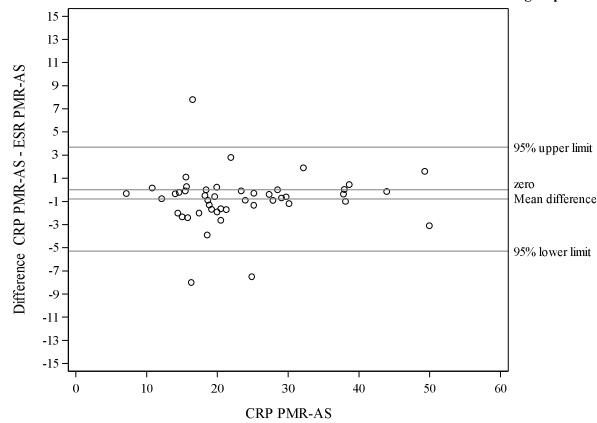

B

Bland Altman Plot of CRP PMR-AS and clin PMR-AS at Inclusion on Placebo group

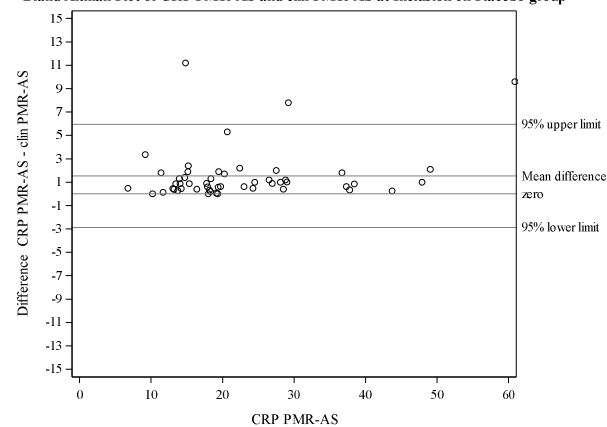

C

Bland Altman Plot of CRP PMR-AS and CRP Imputed PMR-AS at Inclusion on Placebo group

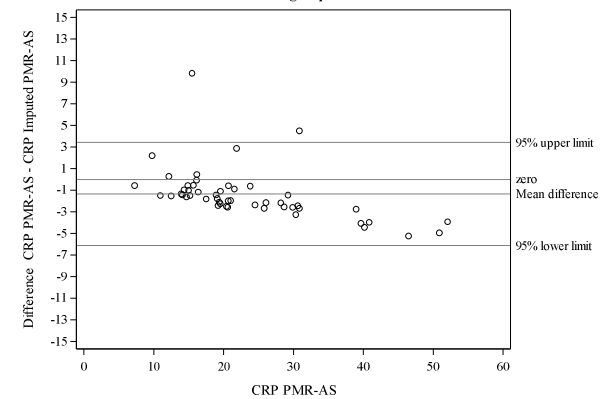

D

E

F

Bland Altman Plot of CRP PMR-AS and ESR PMR-AS at Week 24 on Placebo group

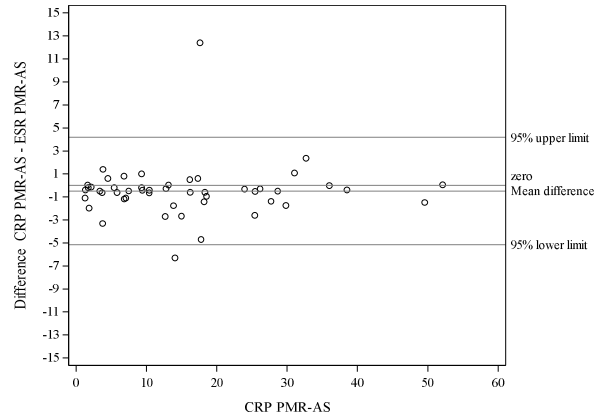

Bland Altman Plot of CRP PMR-AS and clin PMR-AS at Week 24 on Placebo group

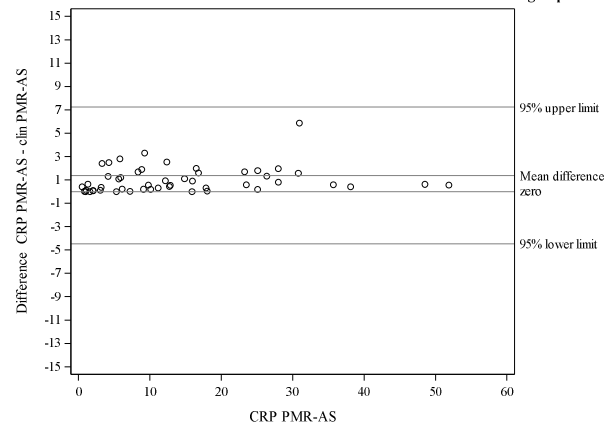

Bland Altman Plot of CRP PMR-AS and CRP Imputed PMR-AS at Week 24 on Placebo group

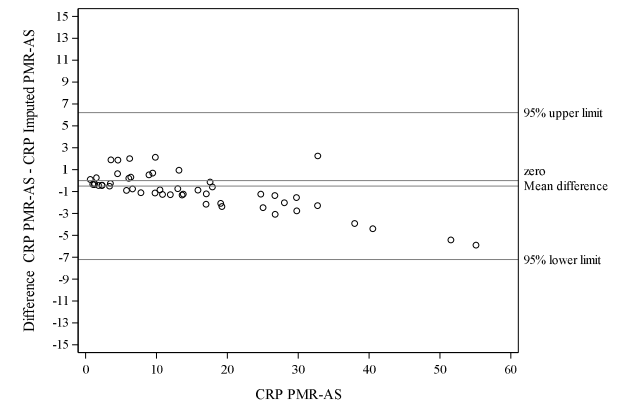

The 95% upper and lower limits are represented, and the mean differences and zero line are represented. One patient could not be represented in graph C with a difference of 20.18 and E with a difference of 20.8.

PMR: polymyalgia rheumatica; AS: activity score; ESR: erythrocyte sedimentation rate; CRP: C reactive protein; clin: clinical; imp-  
CRP: imputed CRP

Figure 4: Bland–Altman plots using CRP-PMR-AS as the gold standard at inclusion in the tocilizumab group (n=49). The y-axis represents the difference between CRP-PMR-AS and ESR-PMR-AS (A), difference between CRP-PMR-AS and clin-PMR-AS (B) and difference between CRP-PMR-AS and imp-CRP PMR-AS (C), and at week 24, in the placebo group, the y-axis shows the difference between CRP-PMR-AS and ESR-PMR-AS (D), difference between CRP-PMR-AS and clin-PMR-AS (E) and difference between CRP-PMR-AS and imp-CRP PMR-AS (F).

A

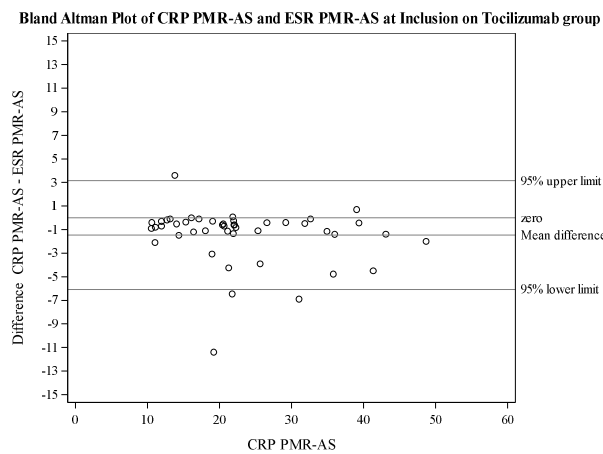

B

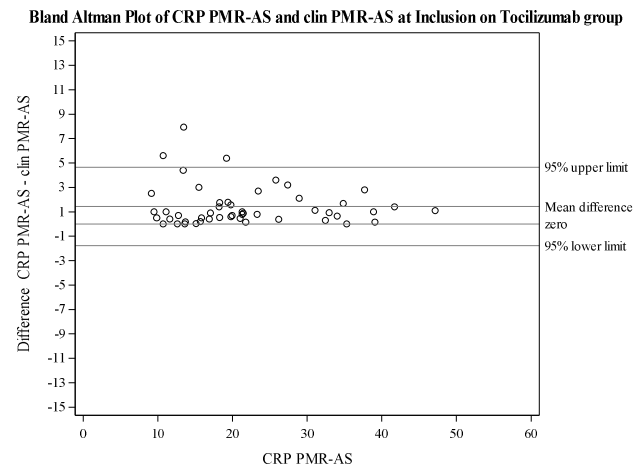

C

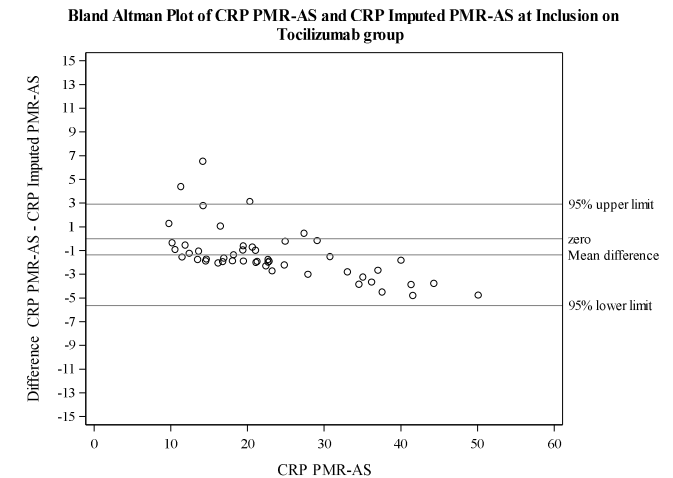

D

e

F

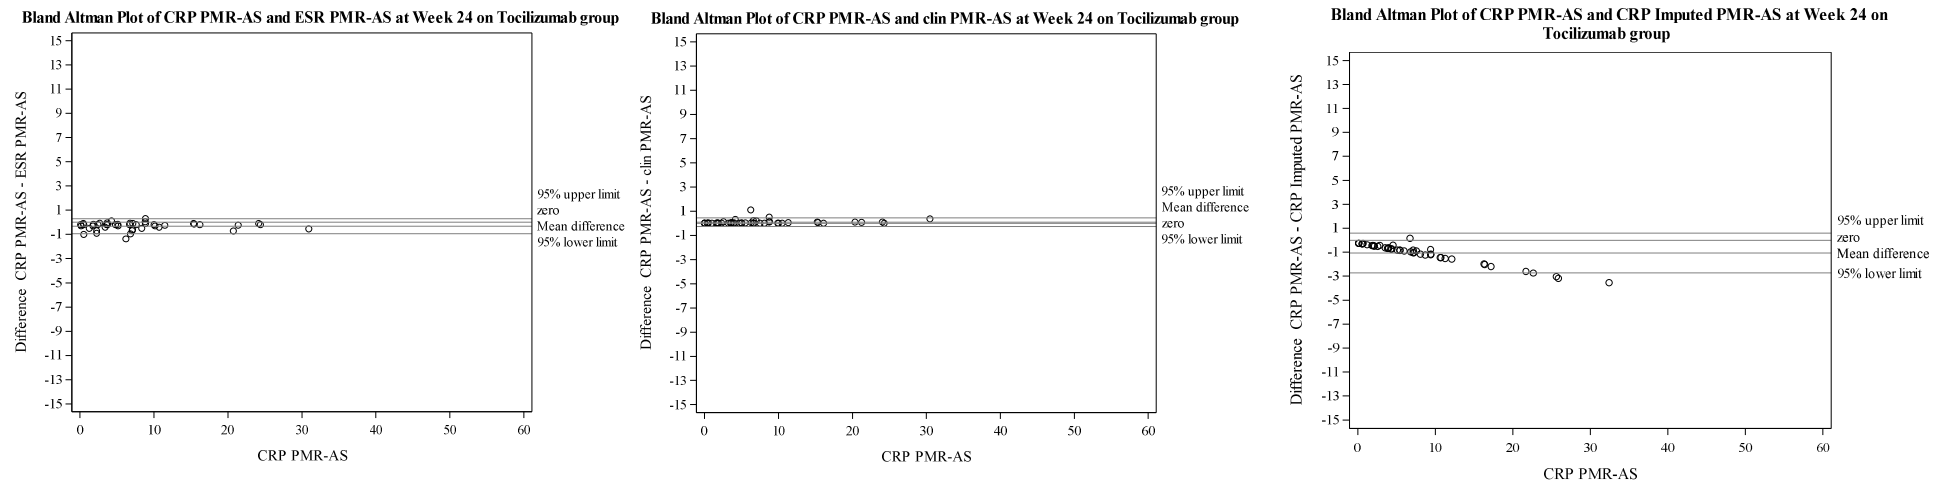

The 95% upper and lower limits are presented, and the mean differences and zero line are presented.

PMR: polymyalgia rheumatica; AS: activity score; ESR: erythrocyte sedimentation rate; CRP: C reactive protein; clin: clinical; imp-

CRP: imputed CRP



Table 1: Intraclass correlation coefficient (ICC) between different PMR-AS at inclusion and week 24, n=100 patients

| Scores                        | time      | ICC  | 95% CI lower limit | 95% CI upper limit |
|-------------------------------|-----------|------|--------------------|--------------------|
| CRP-PMR-AS vs. ESR PMR-AS     | Inclusion | 0,98 | 0,97               | 0,98               |
| CRP-PMR-AS vs. Clin PMR-AS    |           | 0,98 | 0,98               | 0,99               |
| CRP-PMR-AS vs. Imp-CRP PMR-AS |           | 0,98 | 0,97               | 0,99               |
| CRP-PMR-AS vs. ESR PMR-AS     | Week 24   | 0,99 | 0,98               | 0,99               |
| CRP-PMR-AS vs. Clin PMR-AS    |           | 0,98 | 0,97               | 0,98               |
| CRP-PMR-AS vs. Imp-CRP PMR-AS |           | 0,98 | 0,97               | 0,98               |

Table 2: Intraclass correlation coefficient (ICC) between different PMR in the placebo group (n=51) at inclusion and at week 24

| Scores                        | time                      | ICC  | 95% CI lower limit | 95% CI upper limit |
|-------------------------------|---------------------------|------|--------------------|--------------------|
| CRP-PMR-AS vs. ESR PMR-AS     | Inclusion – Placebo group | 0,98 | 0,97               | 0,99               |
| CRP-PMR-AS vs. Clin PMR-AS    |                           | 0,98 | 0,97               | 0,99               |
| CRP-PMR-AS vs. Imp-CRP PMR-AS |                           | 0,98 | 0,97               | 0,99               |
| CRP-PMR-AS vs. ESR PMR-AS     | Week 24– Placebo group    | 0,98 | 0,97               | 0,99               |
| CRP-PMR-AS vs. Clin PMR-AS    |                           | 0,97 | 0,95               | 0,98               |
| CRP-PMR-AS vs. Imp-CRP PMR-AS |                           | 0,97 | 0,95               | 0,98               |

Table 3: Intraclass correlation coefficient (ICC) between different PMR in the tocilizumab group (n=49) at inclusion and at week 24

| Scores                        | time                             | ICC  | 95% CI lower | 95% CI upper |
|-------------------------------|----------------------------------|------|--------------|--------------|
|                               |                                  |      | limit        | limit        |
| CRP-PMR-AS vs. ESR PMR-AS     | Inclusion –<br>tocilizumab group | 0,97 | 0,96         | 0,98         |
| CRP-PMR-AS vs. Clin PMR-AS    |                                  | 0,99 | 0,98         | 0,99         |
| CRP-PMR-AS vs. Imp-CRP PMR-AS |                                  | 0,98 | 0,97         | 0,99         |
| CRP-PMR-AS vs. ESR PMR-AS     | Week 24–<br>tocilizumab group    | 1.00 | 1.00         | 1.00         |
| CRP-PMR-AS vs. Clin PMR-AS    |                                  | 1,0  | 1.00         | 1,00         |
| CRP-PMR-AS vs. Imp-CRP PMR-AS |                                  | 0,99 | 0,99         | 1.00         |

Table 4: Kappa coefficient between the different PMR-AS for the whole population (n=100), calculated at week 12 and week 24, using 10 as the cutoff of CRP-PMR-AS. The results are presented as kappa with 95% confidence intervals.

|                                   | Cut off 0 to 10 vs. >10 at week 12 | Cut off 0 to 10 vs. >10 at week 24 |
|-----------------------------------|------------------------------------|------------------------------------|
|                                   | Kappa (CI 95%)                     | Kappa (CI 95%)                     |
| CRP-PMR-AS vs. ESR-PMR<br>AS      | 0.92 (0.84-1)                      | 0.96 (0.90-1)                      |
| CRP-PMR AS vs. clinical<br>PMR AS | 0.89 (0.79-1)                      | 0.91 (0.83-1)                      |
| CRP-PMR-AS vs. imp-CRP<br>PMR-AS  | 0.90 (0.80-1)                      | 0.82 (0.75-0.96)                   |

Table 5: Contingency tables, number of patients at inclusion in the placebo group and tocilizumab group according to the CRP-PMR-AS in the columns and clin-PMR-AS in the lines, using CRP-PMR-AS cutoffs.

| clinical PMR-AS<br>in tocilizumab group | CRP-PMR-AS<br>In tocilizumab group |             |      | Total |
|-----------------------------------------|------------------------------------|-------------|------|-------|
|                                         | >7 _ <= 10                         | >10 _ <= 17 | > 17 |       |
| >7 _ <= 10                              | 1                                  | 3           | 1    | 5     |
| >10 _ <= 17                             | 0                                  | 12          | 3    | 15    |
| > 17                                    | 0                                  | 0           | 29   | 29    |
| Total                                   | 1                                  | 15          | 33   | 49    |

  

| clinical PMR-AS<br>in placebo group | CRP-PMR-AS<br>In placebo group |             |      | Total |
|-------------------------------------|--------------------------------|-------------|------|-------|
|                                     | >1.5 _ <= 7                    | >10 _ <= 17 | > 17 |       |
| >1.5 _ <= 7                         | 1                              | 0           | 0    | 1     |
| >7 _ <= 10                          | 0                              | 1           | 1    | 2     |
| >10 _ <= 17                         | 0                              | 15          | 0    | 15    |
| > 17                                | 0                              | 0           | 33   | 33    |
| Total                               | 1                              | 16          | 34   | 51    |
